# Supplementary material for: Divergent Trajectories in Adolescent Depression: An Age-Period-Cohort Assessment of the China-Global Divide, 1990-2036
Source: Research Square preprint supplement (doi:10.21203/rs.3.rs-8102198/v1), 2025-12-08
Supplement: Supplementary file 1 [file de05ecde5aebf6423f0948a7.docx]

**Table S1** TheASPR of depression in adolescents aged 10–24 years in all GBD areas from 1990 and 2021.

| **Position** | **1990** | | **2021** | | **EAPC** |
| --- | --- | --- | --- | --- | --- |
| **cases** | **Age-standardized rates per 100,000 people** | **cases** | **Age-standardized rates per 100,000 people** |
|  | **n(95%CI)** | **n(95%CI)** | **n(95%CI)** | **n(95%CI)** | **n(95%CI)** |
| Global | 38476683.31 (30133091.64–48956768.45) | 2486.87 (1947.60-3164.23) | 57488801.52 (44127193.40-73889611.62) | 3045.32 (2337.53-3914.11) | 0.22  （0.05-0.39） |
| Low SDI | 4264369.72 (3253225.37–5574346.70) | 2739.53 (2089.95-3581.09) | 11480881.35 (8605718.17-14945077.18) | 3107.84 (2329.54-4045.59) | -0.03  （-0.17-0.12） |
| Low-middle SDI | 9016205.60 (6911491.12–11692495.41) | 2492.64 (1910.77-3232.53) | 16653939.38 (12699261.81-21849250.56) | 3012.95 (2297.49-3952.86) | 0.08  （-0.11-0.28） |
| Middle SDI | 11802940.97 (9207771.33–15031548.80) | 2150.58 (1677.72-2738.85) | 13868381.90 (10700016.20-17740210.97) | 2509.00 (1935.80-3209.47) | 0.09  （-0.08-0.26） |
| High-middle SDI | 6867076.66 (5463194.42–8596650.98) | 2419.82 (1925.12-3029.29) | 6224703.52 (4783419.34-7980204.78) | 2755.76 (2117.68-3532.94) | 0.09  （-0.06-0.25） |
| High SDI | 6493809.43 (5219197.85–7985653.50) | 3315.58 (2664.79-4077.28) | 9218395.51 (7279862.23-11459503.00) | 4967.48 (3922.87-6175.14) | 0.83  (0.62-1.03) |
| Oceania | 47675.50 (35170.06-65260.54) | 2279.04 (1681.24-3119.66) | 98101.62 (71150.87-137262.50) | 2432.85 (1764.49-3404.01) | -0.01  （-0.08-0.05） |
| East Asia | 7130559.50 (5660934.12-9075407.98) | 1915.89 (1521.02-2438.45) | 3097321.72 (2477476.87-3879073.49) | 1274.56 (1019.49-1596.26) | -1.13  （-1.32--0.94） |
| Southeast Asia | 2729909.16 (2115243.20-3500396.62) | 1839.98 (1425.69-2359.29) | 3983318.37 (3046488.30-5215615.22) | 2329.30 (1781.48-3049.90) | 0.26  （0.05-0.46） |
| Central Asia | 452556.14 (341994.40-589588.34) | 2282.04 (1724.52-2973.03) | 611801.90 (449929.36-836853.73) | 2764.91 (2033.36-3781.98) | 0.4  （0.25-0.55） |
| Central Europe | 542180.67 (418462.68-695428.25) | 1856.89 (1433.17-2381.74) | 426636.34 (324819.23-549506.99) | 2352.40 (1791.00-3029.89) | 0.03  （-0.18-0.25） |
| Australasia | 241425.97 (186798.08-301929.33) | 5018.08 (3882.63-6275.65) | 314195.93 (231363.50-417414.03) | 5476.50 (4032.71-7275.61) | 0.29  （0.16-0.42） |
| High-income Asia Pacific | 911584.63 (730954.47-1127124.79) | 2163.84 (1735.07-2675.47) | 750687.84 (582986.44-949791.02) | 2875.65 (2233.24-3638.36) | 0.5  （0.36-0.63） |
| Eastern Europe | 1058074.98 (821240.51-1382226.02) | 2240.33 (1738.86-2926.67) | 949918.27 (725828.34-1244711.01) | 2878.99 (2199.83-3772.45) | 0.19  （-0.03-0.4） |
| High-income North America | 2523592.72 (2007330.08-3102029.89) | 4125.32 (3281.39-5070.90) | 5015587.75 (4009519.83-6089667.47) | 7036.53 (5625.09-8543.39) | 1.05  （0.78-1.31） |
| Southern Latin America | 440214.37 (344882.95-553646.84) | 3325.70 (2605.50-4182.65) | 666736.94 (498696.14-855657.19) | 4347.40 (3251.70-5579.23) | 0.24  （-0.02-0.51） |
| Western Europe | 3332524.45 (2730988.97-4092626.83) | 4054.14 (3322.35-4978.83) | 3415976.58 (2546202.32-4435447.87) | 4739.45 (3532.69-6153.90) | 0  （-0.24-0.23） |
| Tropical Latin America | 1255863.08 (980154.85-1618236.13) | 2624.06 (2047.98-3381.22) | 1685935.79 (1291883.14-2199642.08) | 3333.43 (2554.31-4349.13) | -0.09  （-0.59-0.42） |
| Central Sub-Saharan Africa | 715746.29 (509795.67-969231.97) | 4135.38 (2945.46-5599.95) | 1978243.99 (1405135.50-2780617.10) | 4401.58 (3126.42-6186.86) | -0.03  （-0.16-0.09） |
| Central Latin America | 1014763.62 (788682.01-1316547.90) | 1870.34 (1453.64-2426.57) | 1840649.92 (1406900.92-2417142.84) | 2830.33 (2163.36-3716.79) | 0.79  （0.55-1.03） |
| Andean Latin America | 231300.34 (173370.22-299750.36) | 1878.91 (1408.33-2434.94) | 464565.41 (335421.76-644553.36) | 2690.91 (1942.87-3733.45) | 0.38  （0.01-0.75） |
| Caribbean | 302398.17 (226012.50-396441.61) | 2831.77 (2116.47-3712.43) | 352083.93 (256978.71-485037.45) | 3108.22 (2268.63-4281.94) | -0.24  （-0.51-0.03） |
| South Asia | 7774723.57 (6107779.83-10031373.30) | 2324.49 (1826.11-2999.19) | 14594747.15 (11408746.74-18638165.56) | 2775.35 (2169.50-3544.25) | -0.01  （-0.22-0.21） |
| North Africa and Middle East | 3967975.24 (2974437.18-5177617.21) | 3643.48 (2731.19-4754.20) | 7308837.36 (5292502.41-9824858.47) | 4503.37 (3261.00-6053.63) | 0.4  （0.25-0.56） |
| Western Sub-Saharan Africa | 1477841.58 (1138416.94-1951155.83) | 2469.50 (1902.32-3260.42) | 4069452.60 (3136028.44-5308432.97) | 2521.88 (1943.43-3289.69) | -0.08  （-0.2-0.05） |
| Eastern Sub-Saharan Africa | 1879518.41 (1456492.54-2429974.39) | 3029.84 (2347.91-3917.20) | 5085287.28 (3820002.51-6769075.04) | 3496.57 (2626.58-4654.32) | -0.11  （-0.28-0.05） |
| Southern Sub-Saharan Africa | 446254.91 (352130.62-561668.47) | 2612.18 (2061.21-3287.76) | 778714.87 (593451.38-995024.06) | 3569.71 (2720.44-4561.29) | 0.62  （0.41-0.82） |
